## Increased CaMKII-dependent pro-arrhythmic activity in a novel mouse model of obstructive sleep apnoea

B. Schaner, S. Lebek, P. Hegner, L.S. Maier, M. Arzt, S. Wagner

University Hospital Regensburg, Department for Internal Medicine II, Regensburg, Germany

**Funding Acknowledgement:** Type of funding sources: Public grant(s) – National budget only. Main funding source(s): Benedikt Schaner / Mr., this work is supported by a research grant of the German Cardiac Society (DGK); Stefan Wagner / Professor, was funded by DFG grants

**Background:** Obstructive sleep apnoea (OSA) is frequently associated with atrial arrhythmias, but detailed mechanisms remain elusive. Most recently, we found an increased CaMKII-dependent pro-arrhythmic activity in patients with sleep apnoea. Since patients suffer from various confounding comorbidities, we have developed a novel mouse model of OSA by tongue enlargement.

**Purpose:** We tested if mice with OSA exhibit increased atrial CaMKII-dependent pro-arrhythmic activity.

**Methods:** Polytetrafluoroethylene (PTFE) was injected into the tongue of 12 wild-type (WT) and 10 CaMKII knock-out (CKO) mice. 9 WT and 9 CKO mice were used as control without PTFE injection. Inspiratory flow limitations and apnoeas were monitored during murine sleep phases by whole-body plethysmography (Buxco). After eight weeks, isolated atrial cardiomyocytes were incubated with the Ca-sensitive dye FURA-2 AM for 15 min. Regular Ca transients were elicited by electrical field stimulation (1 Hz, 20 V for 4 ms) using epifluorescence microscopy. Pro-arrhythmic non-stimulated events were defined as deviations from diastolic Ca baseline between two stimulated Ca transients.

**Results:** Sonographic measurements revealed a significant increase in

mean tongue diameter from (in mm)  $3.7 \pm 0.1$  to  $5.1 \pm 0.1$  after PTFE injection ( $n=23$ ,  $p<0.0001$ ). There was a significant correlation between magnitude of tongue diameter and frequency of apnoeas in OSA mice ( $p=0.046$ ,  $r^2=0.19$ , Fig. 1A). Interestingly, we observed a significantly increased frequency of pro-arrhythmic events of (in  $s^{-1}$ )  $0.06 \pm 0.01$  in WT OSA mice compared to  $0.02 \pm 0.01$  in WT control mice ( $p=0.047$ , Fig. 1B). Similar results were observed at higher stimulation frequencies (2 and 4 Hz). There was a significant correlation of pro-arrhythmic events with inspiratory flow limitations ( $p=0.03$ ,  $r^2=0.24$ , Fig. 1C) and with the frequency of apnoeas by strong trend ( $p=0.06$ ,  $r^2=0.18$ ). In contrast, no increase in atrial pro-arrhythmic events was observed in CKO mice after PTFE injection (for CKO mice after PTFE vs. CKO mice without PTFE,  $0.03 \pm 0.01 s^{-1}$  vs.  $0.03 \pm 0.01 s^{-1}$ ,  $p=0.89$ , Fig. 1B). Accordingly, the correlations between pro-arrhythmic events and both inspiratory flow limitations ( $p=0.36$ ,  $r^2=0.05$ , Fig. 1C) and apnoeas ( $p=0.82$ ,  $r^2=0.004$ ) were completely abolished in CKO mice.

**Conclusion:** In a novel mouse model of obstructive sleep apnoea, atrial pro-arrhythmic activity was increased in a CaMKII-dependent fashion, which may have therapeutic implications.

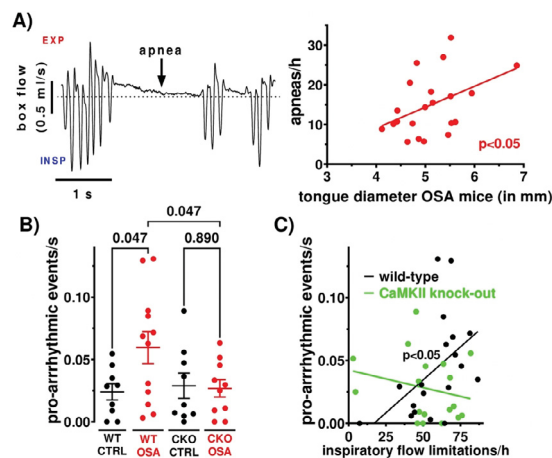

Figure 1
